# Supplementary material
Source: MDPI journal article supplement (https://www.mdpi.com/2305-6320/7/1/3)
Supplement: s1 [file s1]

## **Auto-évaluation à propos des effets placebos :**

**Consignes :** Cochez les réponses correctes. Il peut y avoir d'aucune à et toutes les réponses justes. Le questionnaire comporte 17 questions réparties sur 3 pages.

### **Connaissez-vous le placebo ?**

- ☐ Non pas du tout
- ☐ J'en ai déjà entendu parler
- ☐ J'ai quelques notions
- ☐ Oui je sais ce qu'est le placebo

### **1. Le placebo :**

- ☐ A un effet seulement chez les personnes qui y croient
- ☐ Fonctionne uniquement si le patient ignore qu'il s'agit d'un placebo
- ☐ A un effet si le patient sait qu'il s'agit d'un placebo

### **2. Le mécanisme de l'effet placebo est**

- ☐ Inexistant
- ☐ Psychologique
- ☐ Psychologique et physiologique

### **3. Les traitements placebo ne sont efficaces que sur les patients qui mentent à propos de leurs symptômes**

- ☐ Vrai
- ☐ Faux

### **4. Un comprimé de paracétamol utilisé contre la douleur est un placebo**

- ☐ Vrai
- ☐ Faux

### **5. Les effets placebo fonctionnent notamment grâce aux attentes des patients**

- ☐ Vrai
- ☐ Faux

### **6. Les effets placebos ne sont efficaces que chez les personnes optimistes**

- ☐ Vrai
- ☐ Faux

### **7. Les traitements placebo peuvent traiter des douleurs**

- ☐ Vrai
- ☐ Faux

**8. Les traitements placebo ne peuvent pas résoudre des symptômes nécessitant une médication précise**

- ☐ Vrai ☐ Faux

**9. Les traitements placebo dits « antalgiques » ne soulagent que les douleurs imaginaires (i.e. douleurs n'étant pas liées à une lésion/maladie)**

- ☐ Vrai ☐ Faux

**10. Un comprimé sans substance pharmacologique est un placebo**

- ☐ Vrai ☐ Faux

**11. Les effets placebo fonctionnent grâce au contexte dans lequel est administré le soin**

- ☐ Vrai ☐ Faux

**12. Des modifications physiologiques, comme la sécrétion de molécules chimiques, ont lieu dans le cerveau quand vous recevez un placebo**

- ☐ Vrai ☐ Faux

**13. Les effets placebo sont imaginaires et n'ont d'effets que sur notre psychique et non sur notre corps**

- ☐ Vrai ☐ Faux

**14. Les effets placebo n'ont lieu que lors des expériences, en recherche clinique**

- ☐ Vrai ☐ Faux

**15. Un comprimé placebo peut avoir des effets secondaires**

- ☐ Vrai ☐ Faux

**16. Il n'existe pas d'effets placebo lors d'un traitement médical classique**

- ☐ Vrai ☐ Faux

**17. La couleur, la forme et le conditionnement d'un comprimé placebo peuvent modifier son efficacité**

- ☐ Vrai
- ☐ Faux
