# Supplementary material
Source: MDPI journal article supplement (https://www.mdpi.com/2305-6320/7/1/3)
Supplement: s1 [file s1]

## Self-assessment about placebo effects:

**Instructions:** Check the correct answers. There can be zero to all answers correct. The questionnaire consists of 17 questions spread over 3 pages.

### Do you know about the placebo effect?

- ☐ Not at all
- ☐ I have already heard about it
- ☐ I have a couple notions
- ☐ Yes, I know what it is

#### 1. The placebo :

- ☐ Only has an effect on people who believe in it
- ☐ Only works if the patient ignores that the treatment is a placebo
- ☐ Has an effect if the patient knows it's a placebo

#### 2. The mechanism of the placebo effect is

- ☐ Non-existent
- ☐ Psychological
- ☐ Psychological et physiological

#### 3. Placebo treatments are only effective on patients who are lying about their symptoms

- ☐ True
- ☐ False

#### 4. A paracetamol tablet used to treat pain is a placebo

- ☐ True
- ☐ False

#### 5. The placebo effect works in part through patient's expectancy

- ☐ True
- ☐ False

#### 6. The placebo effect is effective only with optimistic patients

- ☐ True
- ☐ False

#### 7. Placebo treatments can help in treating pain

- ☐ True
- ☐ False

- 8. Placebo treatments can't resolve symptoms requiring specific medications**
- ☐ True ☐ False
- 9. Analgesic placebo treatments only work on "imaginary" pain (i.e. pain that is not caused by a lesion or disease)**
- ☐ True ☐ False
- 10. A tablet with no pharmacological substance is a placebo**
- ☐ True ☐ False
- 11. The placebo effect work thanks to the context in which the care is administered**
- ☐ True ☐ False
- 12. Physiological changes, such as the secretion of chemical molecules, occur in the brain when you receive a placebo**
- ☐ True ☐ False
- 13. The placebo effect are imaginary and have effects only on our psyche and not on our body**
- ☐ True ☐ False
- 14. The placebo effect only occurs during experiments, in clinical research**
- ☐ True ☐ False
- 15. A placebo tablet can have secondary effects**
- ☐ True ☐ False
- 16. There are no placebo effects during conventional medical treatment**
- ☐ True ☐ False
- 17. The colour, shape and packaging of a placebo tablet can affect its effectiveness**
- ☐ True ☐ False
